# Supplementary material for: Assembly of BF4−, PF6−, ClO4− and F− with trinuclear copper(i) acetylide complexes bearing amide groups: structural diversity, photophysics and anion binding properties
Source: Royal Society of Chemistry journal article supplement (doi:10.1039/c5ra18534c), 2015-01-01
Supplement: c5ra18534c1.pdf [file c5ra18534c1.pdf]

## Supporting Information

### **Assembly of $\text{BF}_4^-$ , $\text{PF}_6^-$ , $\text{ClO}_4^-$ and $\text{F}^-$ with trinuclear copper(I) acetylide complexes bearing amide groups: Structural diversity, photophysics and anion binding properties**

Hua-Yun Shi, Yong-Liang Huang, Jia-Kai Sun, Ji-Jun Jiang, Zhi-Xing Luo, Hui-Tao Ling, Chi-Keung Lam and Hsiu-Yi Chao\*

*MOE Key Laboratory of Bioinorganic and Synthetic Chemistry, School of Chemistry and Chemical Engineering, Sun Yat-Sen University, Guangzhou 510275, P. R. China*

**Table S1.** Crystallographic data for **1·BF<sub>4</sub>**, **1·PF<sub>6</sub>** and **1·ClO<sub>4</sub>**.

|                                                                                      | <b>1·BF<sub>4</sub></b>                                                                                         | <b>1·PF<sub>6</sub></b>                                                                                           | <b>1·ClO<sub>4</sub></b>                                                                         |
|--------------------------------------------------------------------------------------|-----------------------------------------------------------------------------------------------------------------|-------------------------------------------------------------------------------------------------------------------|--------------------------------------------------------------------------------------------------|
| Formula                                                                              | C <sub>105</sub> H <sub>83.5</sub> BCu <sub>3</sub> F <sub>4</sub> N <sub>4</sub> O <sub>6</sub> P <sub>6</sub> | C <sub>216</sub> H <sub>177</sub> Cu <sub>6</sub> F <sub>12</sub> N <sub>11</sub> O <sub>12</sub> P <sub>14</sub> | C <sub>105</sub> H <sub>84</sub> ClCu <sub>3</sub> N <sub>4</sub> O <sub>10</sub> P <sub>6</sub> |
| <i>M</i> (g/mol)                                                                     | 1960.51                                                                                                         | 4161.51                                                                                                           | 1973.65                                                                                          |
| cryst syst                                                                           | Orthorhombic                                                                                                    | Orthorhombic                                                                                                      | Orthorhombic                                                                                     |
| space group                                                                          | Pccn                                                                                                            | Pccn                                                                                                              | Pccn                                                                                             |
| <i>a</i> (Å)                                                                         | 22.4406(2)                                                                                                      | 37.4996(2)                                                                                                        | 37.5964(4)                                                                                       |
| <i>b</i> (Å)                                                                         | 37.5572(3)                                                                                                      | 22.30710(10)                                                                                                      | 22.4534                                                                                          |
| <i>c</i> (Å)                                                                         | 23.51116(19)                                                                                                    | 23.64730(10)                                                                                                      | 23.4691(2)                                                                                       |
| <i>α</i> (°)                                                                         | 90                                                                                                              | 90                                                                                                                | 90                                                                                               |
| <i>β</i> (°)                                                                         | 90                                                                                                              | 90                                                                                                                | 90                                                                                               |
| <i>γ</i> (°)                                                                         | 90                                                                                                              | 90                                                                                                                | 90                                                                                               |
| <i>V</i> (Å <sup>3</sup> )                                                           | 19815.3(3)                                                                                                      | 19781.14(16)                                                                                                      | 19811.8(4)                                                                                       |
| <i>Z</i>                                                                             | 8                                                                                                               | 4                                                                                                                 | 8                                                                                                |
| <i>D<sub>c</sub></i> (g cm <sup>-3</sup> )                                           | 1.314                                                                                                           | 1.397                                                                                                             | 1.323                                                                                            |
| <i>T</i> (K)                                                                         | 293(2)                                                                                                          | 150(2)                                                                                                            | 150(2)                                                                                           |
| reflns collected                                                                     | 76185                                                                                                           | 93931                                                                                                             | 46763                                                                                            |
| indep reflns                                                                         | 16018                                                                                                           | 17425                                                                                                             | 17318                                                                                            |
| <i>R<sub>int</sub></i>                                                               | 0.0365                                                                                                          | 0.0347                                                                                                            | 0.0364                                                                                           |
| <i>R<sup>a</sup></i> , <i>R<sub>w</sub><sup>b</sup></i> [ <i>I</i> > 2σ( <i>I</i> )] | 0.0733, 0.1948                                                                                                  | 0.0699, 0.2008                                                                                                    | 0.0604, 0.1454                                                                                   |
| GOF on <i>F</i> <sup>2</sup>                                                         | 1.091                                                                                                           | 1.088                                                                                                             | 1.060                                                                                            |

<sup>a</sup>  $R = \Sigma(|F_0| - |F_c|) / \Sigma|F_0|$     <sup>b</sup>  $R_w = [\Sigma w(|F_0| - |F_c|)^2 / \Sigma w(|F_0|)^2]^{1/2}$

**Table S2.** Crystallographic data for **2·BF<sub>4</sub>** and **3·BF<sub>4</sub>**.

|                                                                                      | <b>2·BF<sub>4</sub></b>                                                                                        | <b>3·BF<sub>4</sub></b>                                                                                                         |
|--------------------------------------------------------------------------------------|----------------------------------------------------------------------------------------------------------------|---------------------------------------------------------------------------------------------------------------------------------|
| Formula                                                                              | C <sub>107</sub> H <sub>84</sub> BCu <sub>3</sub> F <sub>10</sub> N <sub>2</sub> O <sub>2</sub> P <sub>6</sub> | C <sub>420</sub> H <sub>343</sub> B <sub>4</sub> Cu <sub>12</sub> F <sub>16</sub> N <sub>8</sub> O <sub>8</sub> P <sub>24</sub> |
| <i>M</i> (g/mol)                                                                     | 2007.01                                                                                                        | 7483.02                                                                                                                         |
| cryst syst                                                                           | monoclinic                                                                                                     | monoclinic                                                                                                                      |
| space group                                                                          | C2/c                                                                                                           | Pc                                                                                                                              |
| <i>a</i> (Å)                                                                         | 29.9632(4)                                                                                                     | 27.5828(2)                                                                                                                      |
| <i>b</i> (Å)                                                                         | 22.3042(3)                                                                                                     | 28.8914(2)                                                                                                                      |
| <i>c</i> (Å)                                                                         | 30.6835(4)                                                                                                     | 24.54769(19)                                                                                                                    |
| $\alpha$ (°)                                                                         | 90.00                                                                                                          | 90.00                                                                                                                           |
| $\beta$ (°)                                                                          | 101.1740(10)                                                                                                   | 103.7049(8)                                                                                                                     |
| $\gamma$ (°)                                                                         | 90.00                                                                                                          | 90.00                                                                                                                           |
| <i>V</i> (Å <sup>3</sup> )                                                           | 20117.2(5)                                                                                                     | 19005.2(3)                                                                                                                      |
| <i>Z</i>                                                                             | 8                                                                                                              | 2                                                                                                                               |
| <i>D<sub>c</sub></i> (mg cm <sup>-3</sup> )                                          | 1.325                                                                                                          | 1.308                                                                                                                           |
| <i>T</i> (K)                                                                         | 293(2)                                                                                                         | 293(2)                                                                                                                          |
| reflns collected                                                                     | 55840                                                                                                          | 87165                                                                                                                           |
| indep reflns                                                                         | 17654                                                                                                          | 41477                                                                                                                           |
| <i>R<sub>int</sub></i>                                                               | 0.0392                                                                                                         | 0.0325                                                                                                                          |
| <i>R<sup>a</sup></i> , <i>R<sub>w</sub><sup>b</sup></i> [ <i>I</i> > 2σ( <i>I</i> )] | 0.0412, 0.1085                                                                                                 | 0.0392, 0.1005                                                                                                                  |
| GOF on <i>F</i> <sup>2</sup>                                                         | 1.056                                                                                                          | 1.016                                                                                                                           |

<sup>a</sup>  $R = \Sigma(|F_0| - |F_c|) / \Sigma|F_0|$     <sup>b</sup>  $R_w = [\Sigma w(|F_0| - |F_c|)^2 / \Sigma w(|F_0|)^2]^{1/2}$

**Table S3.** Crystallographic data for **4·BF<sub>4</sub>** and **4·F**.

|                                                                                      | <b>4·BF<sub>4</sub></b>                                                                                       | <b>4·F</b>                                                                                     |
|--------------------------------------------------------------------------------------|---------------------------------------------------------------------------------------------------------------|------------------------------------------------------------------------------------------------|
| Formula                                                                              | C <sub>107</sub> H <sub>90</sub> BCu <sub>3</sub> F <sub>4</sub> N <sub>2</sub> O <sub>4</sub> P <sub>6</sub> | C <sub>107</sub> H <sub>90</sub> Cu <sub>3</sub> FN <sub>2</sub> O <sub>4</sub> P <sub>6</sub> |
| <i>M</i> (g/mol)                                                                     | 1931.06                                                                                                       | 1863.25                                                                                        |
| cryst syst                                                                           | monoclinic                                                                                                    | monoclinic                                                                                     |
| space group                                                                          | P2 <sub>1</sub> /c                                                                                            | P2 <sub>1</sub> /n                                                                             |
| <i>a</i> (Å)                                                                         | 22.36838(19)                                                                                                  | 17.90690(10)                                                                                   |
| <i>b</i> (Å)                                                                         | 34.9812(3)                                                                                                    | 23.0779(2)                                                                                     |
| <i>c</i> (Å)                                                                         | 25.4082(2)                                                                                                    | 27.5279(3)                                                                                     |
| $\alpha$ (°)                                                                         | 90.00                                                                                                         | 90.00                                                                                          |
| $\beta$ (°)                                                                          | 90.3117(8)                                                                                                    | 104.6560(10)                                                                                   |
| $\gamma$ (°)                                                                         | 90.00                                                                                                         | 90.00                                                                                          |
| <i>V</i> (Å <sup>3</sup> )                                                           | 19881.0(3)                                                                                                    | 11005.85(17)                                                                                   |
| <i>Z</i>                                                                             | 8                                                                                                             | 4                                                                                              |
| <i>D<sub>c</sub></i> (mg cm <sup>-3</sup> )                                          | 1.290                                                                                                         | 1.124                                                                                          |
| <i>T</i> (K)                                                                         | 150(2)                                                                                                        | 173(2)                                                                                         |
| reflns collected                                                                     | 130764                                                                                                        | 48380                                                                                          |
| indep reflns                                                                         | 34881                                                                                                         | 19328                                                                                          |
| <i>R<sub>int</sub></i>                                                               | 0.0488                                                                                                        | 0.0378                                                                                         |
| <i>R<sup>a</sup></i> , <i>R<sub>w</sub><sup>b</sup></i> [ <i>I</i> > 2σ( <i>I</i> )] | 0.1195, 0.3058                                                                                                | 0.0444, 0.1233                                                                                 |
| GOF on <i>F</i> <sup>2</sup>                                                         | 1.066                                                                                                         | 1.029                                                                                          |

<sup>a</sup>  $R = \Sigma(|F_0| - |F_c|) / \Sigma|F_0|$     <sup>b</sup>  $R_w = [\Sigma w(|F_0| - |F_c|)^2 / \Sigma w(|F_0|)^2]^{1/2}$

**Table S4.** Selected bond lengths (Å) and angles (°) for **1·BF<sub>4</sub>** and **1·ClO<sub>4</sub>**.

| <b>1·BF<sub>4</sub></b> |            | <b>1·ClO<sub>4</sub></b> |            |
|-------------------------|------------|--------------------------|------------|
| Cu(1)···Cu(2)           | 2.7378(10) | Cu(1)···Cu(2)            | 2.5709(8)  |
| Cu(1)···Cu(3)           | 2.5438(9)  | Cu(1)···Cu(3)            | 2.7466(8)  |
| Cu(2)···Cu(3)           | 2.5644(10) | Cu(2)···Cu(3)            | 2.5473(7)  |
| C(83)–Cu(1)             | 2.409(5)   | C(1)–Cu(1)               | 2.318(4)   |
| C(83)–Cu(2)             | 2.176(5)   | C(1)–Cu(2)               | 2.111(4)   |
| C(83)–Cu(3)             | 2.071(5)   | C(1)–Cu(3)               | 2.130(4)   |
| C(99)–Cu(1)             | 2.128(5)   | C(16)–Cu(1)              | 2.168(4)   |
| C(99)–Cu(2)             | 2.302(5)   | C(16)–Cu(2)              | 2.076(4)   |
| C(99)–Cu(3)             | 2.107(5)   | C(16)–Cu(3)              | 2.423(4)   |
| Cu(1)–P(4)              | 2.2605(14) | Cu(1)–P(1)               | 2.2945(11) |
| Cu(1)–P(5)              | 2.2946(14) | Cu(1)–P(6)               | 2.2662(12) |
| Cu(2)–P(6)              | 2.2677(16) | Cu(2)–P(2)               | 2.2845(10) |
| Cu(2)–P(7)              | 2.2978(14) | Cu(2)–P(3)               | 2.2838(11) |
| Cu(3)–P(8)              | 2.2822(13) | Cu(3)–P(4)               | 2.2949(11) |
| Cu(3)–P(9)              | 2.2835(14) | Cu(3)–P(5)               | 2.2598(11) |
| C(83)–C(84)             | 1.207(7)   | C(1)–C(2)                | 1.203(5)   |
| C(99)–C(100)            | 1.219(7)   | C(16)–C(17)              | 1.207(6)   |
| C(91)–O(114)            | 1.223(7)   | C(9)–O(1)                | 1.216(5)   |
| C(107)–O(117)           | 1.218(6)   | C(24)–O(4)               | 1.224(6)   |
| N(121)–O(118)           | 1.232(8)   | N(2)–O(2)                | 1.223(6)   |
| N(121)–O(119)           | 1.224(9)   | N(2)–O(3)                | 1.226(6)   |
| N(123)–O(115)           | 1.235(7)   | N(4)–O(5)                | 1.223(6)   |
| N(123)–O(116)           | 1.224(7)   | N(4)–O(6)                | 1.216(6)   |
| C(84)–C(83)–Cu(1)       | 122.6(4)   | C(2)–C(1)–Cu(1)          | 124.6(3)   |
| C(84)–C(83)–Cu(2)       | 126.3(4)   | C(2)–C(1)–Cu(2)          | 149.3(3)   |
| C(84)–C(83)–Cu(3)       | 157.4(5)   | C(2)–C(1)–Cu(3)          | 132.7(3)   |
| C(100)–C(99)–Cu(1)      | 132.5(4)   | C(17)–C(16)–Cu(1)        | 125.8(3)   |
| C(100)–C(99)–Cu(2)      | 124.8(4)   | C(17)–C(16)–Cu(2)        | 157.3(4)   |
| C(100)–C(99)–Cu(3)      | 149.1(4)   | C(17)–C(16)–Cu(3)        | 123.6(3)   |
| Cu(1)–C(83)–Cu(2)       | 73.14(15)  | Cu(1)–C(1)–Cu(2)         | 70.78(11)  |
| Cu(1)–C(83)–Cu(3)       | 68.72(15)  | Cu(1)–C(1)–Cu(3)         | 76.12(12)  |
| Cu(2)–C(83)–Cu(3)       | 74.25(16)  | Cu(2)–C(1)–Cu(3)         | 73.81(12)  |
| Cu(1)–C(99)–Cu(2)       | 76.22(15)  | Cu(1)–C(16)–Cu(2)        | 74.54(13)  |
| Cu(1)–C(99)–Cu(3)       | 73.83(15)  | Cu(1)–C(16)–Cu(3)        | 68.48(12)  |
| Cu(2)–C(99)–Cu(3)       | 70.98(14)  | Cu(2)–C(16)–Cu(3)        | 68.48(12)  |

**Table S5.** Selected bond lengths (Å) and angles (°) for **2·BF<sub>4</sub>** and **3·BF<sub>4</sub>**

| <b>2·BF<sub>4</sub></b> |            | <b>3·BF<sub>4</sub></b> |            |
|-------------------------|------------|-------------------------|------------|
| Cu(1)···Cu(2)           | 2.8375(5)  | Cu(1)···Cu(2)           | 2.5908(8)  |
| Cu(1)···Cu(3)           | 2.6987(5)  | Cu(1)···Cu(3)           | 2.5774(8)  |
| Cu(2)···Cu(3)           | 2.4944(4)  | Cu(2)···Cu(3)           | 2.6297(8)  |
| C(117)–Cu(1)            | 2.018(2)   | C(1)–Cu(1)              | 2.251(4)   |
| C(117)–Cu(2)            | 2.317(2)   | C(1)–Cu(2)              | 2.080(4)   |
| C(117)–Cu(3)            | 2.157(2)   | C(1)–Cu(3)              | 2.223(4)   |
| C(119)–Cu(2)            | 2.079(2)   | C(16)–Cu(1)             | 2.121(4)   |
| C(119)–Cu(3)            | 2.041(2)   | C(16)–Cu(2)             | 2.222(4)   |
| Cu(1)–P(1)              | 2.2991(6)  | C(16)–Cu(3)             | 2.174(4)   |
| Cu(1)–P(6)              | 2.2901(6)  | Cu(1)–P(1)              | 2.2716(12) |
| Cu(2)–P(4)              | 2.2609(7)  | Cu(1)–P(6)              | 2.2957(12) |
| Cu(2)–P(5)              | 2.3193(6)  | Cu(2)–P(2)              | 2.2872(12) |
| Cu(3)–P(2)              | 2.2540(6)  | Cu(2)–P(3)              | 2.2803(11) |
| Cu(3)–P(3)              | 2.2838(6)  | Cu(3)–P(4)              | 2.2787(10) |
| C(104)–C(117)           | 1.212(3)   | Cu(3)–P(5)              | 2.2826(11) |
| C(113)–C(119)           | 1.211(3)   | C(1)–C(2)               | 1.205(6)   |
| C(18)–O(1)              | 1.213(4)   | C(16)–C(17)             | 1.222(6)   |
| C(92)–O(2)              | 1.232(3)   | C(9)–O(1)               | 1.225(9)   |
| C(104)–C(117)–Cu(1)     | 136.0(2)   | C(24)–O(4)              | 1.250(6)   |
| C(104)–C(117)–Cu(2)     | 127.07(19) | C(2)–C(1)–Cu(1)         | 130.3(3)   |
| C(104)–C(117)–Cu(3)     | 137.85(19) | C(2)–C(1)–Cu(2)         | 151.4(4)   |
| C(113)–C(119)–Cu(2)     | 138.5(2)   | C(2)–C(1)–Cu(3)         | 124.2(3)   |
| C(113)–C(119)–Cu(3)     | 146.1(2)   | C(17)–C(16)–Cu(1)       | 147.9(4)   |
| Cu(1)–C(117)–Cu(2)      | 81.45(8)   | C(17)–C(16)–Cu(2)       | 128.6(3)   |
| Cu(1)–C(117)–Cu(3)      | 80.48(8)   | C(17)–C(16)–Cu(3)       | 130.8(3)   |
| Cu(2)–C(117)–Cu(3)      | 67.65(7)   | Cu(1)–C(1)–Cu(2)        | 73.36(13)  |
| Cu(2)–C(119)–Cu(3)      | 74.57(10)  | Cu(1)–C(1)–Cu(3)        | 70.35(13)  |
|                         |            | Cu(2)–C(1)–Cu(3)        | 75.25(13)  |
|                         |            | Cu(1)–C(16)–Cu(2)       | 73.20(13)  |
|                         |            | Cu(1)–C(16)–Cu(3)       | 73.73(13)  |
|                         |            | Cu(2)–C(16)–Cu(3)       | 73.47(13)  |

**Table S6.** Selected bond lengths (Å) and angles (°) for **4·BF<sub>4</sub>** and **4·F**

| <b>4·BF<sub>4</sub></b> |            | <b>4·F</b>        |            |
|-------------------------|------------|-------------------|------------|
| Cu(1)···Cu(2)           | 2.6006(10) | Cu(1)···Cu(2)     | 2.6288(4)  |
| Cu(1)···Cu(3)           | 2.6089(10) | Cu(1)···Cu(3)     | 2.6204(4)  |
| Cu(2)···Cu(3)           | 2.5791(10) | Cu(2)···Cu(3)     | 2.6191(4)  |
| C(1)–Cu(1)              | 2.182(5)   | C(1)–Cu(1)        | 2.250(2)   |
| C(1)–Cu(2)              | 2.217(5)   | C(1)–Cu(2)        | 2.296(2)   |
| C(1)–Cu(3)              | 2.344(5)   | C(1)–Cu(3)        | 2.047(2)   |
| C(17)–Cu(1)             | 2.220(5)   | C(17)–Cu(1)       | 2.209(2)   |
| C(17)–Cu(2)             | 2.203(5)   | C(17)–Cu(2)       | 2.047(2)   |
| C(17)–Cu(3)             | 2.111(5)   | C(17)–Cu(3)       | 2.278(2)   |
| Cu(1)–P(1)              | 2.2929(15) | Cu(1)–P(1)        | 2.2700(5)  |
| Cu(1)–P(6)              | 2.2969(16) | Cu(1)–P(3)        | 2.2705(6)  |
| Cu(2)–P(2)              | 2.2649(14) | Cu(2)–P(4)        | 2.2902(5)  |
| Cu(2)–P(3)              | 2.2839(14) | Cu(2)–P(6)        | 2.2849(6)  |
| Cu(3)–P(4)              | 2.2874(14) | Cu(3)–P(2)        | 2.2904(5)  |
| Cu(3)–P(5)              | 2.2633(14) | Cu(3)–P(5)        | 2.2793(6)  |
| C(1)–C(2)               | 1.134(8)   | C(1)–C(2)         | 1.211(3)   |
| C(17)–C(18)             | 1.185(8)   | C(17)–C(18)       | 1.215(3)   |
| C(9)–O(1)               | 1.223(11)  | C(9)–O(1)         | 1.240(3)   |
| C(25)–O(3)              | 1.202(8)   | C(25)–O(3)        | 1.224(3)   |
| C(2)–C(1)–Cu(1)         | 145.1(5)   | C(2)–C(1)–Cu(1)   | 119.21(17) |
| C(2)–C(1)–Cu(2)         | 132.2(5)   | C(2)–C(1)–Cu(2)   | 122.50(16) |
| C(2)–C(1)–Cu(3)         | 136.2(5)   | C(2)–C(1)–Cu(3)   | 160.15(18) |
| C(18)–C(17)–Cu(1)       | 140.5(5)   | C(18)–C(17)–Cu(1) | 119.95(17) |
| C(18)–C(17)–Cu(2)       | 134.2(4)   | C(18)–C(17)–Cu(2) | 156.79(17) |
| C(18)–C(17)–Cu(3)       | 134.6(5)   | C(18)–C(17)–Cu(3) | 124.96(16) |
| Cu(1)–C(1)–Cu(2)        | 72.48(17)  | Cu(1)–C(1)–Cu(2)  | 70.66(6)   |
| Cu(1)–C(1)–Cu(3)        | 70.30(16)  | Cu(1)–C(1)–Cu(3)  | 74.98(7)   |
| Cu(2)–C(1)–Cu(3)        | 68.82(16)  | Cu(2)–C(1)–Cu(3)  | 73.93(6)   |
| Cu(1)–C(17)–Cu(2)       | 72.02(16)  | Cu(1)–C(17)–Cu(2) | 76.18(7)   |
| Cu(1)–C(17)–Cu(3)       | 74.03(17)  | Cu(1)–C(17)–Cu(3) | 71.43(6)   |
| Cu(2)–C(17)–Cu(3)       | 73.40(17)  | Cu(2)–C(17)–Cu(3) | 74.32(7)   |

**Table S7.** Photophysical data of ligands **L1–L4** at 298 K.

| ligands   | medium | $\lambda_{\text{abs}} / \text{nm}$ ( $\epsilon / \text{dm}^3\text{mol}^{-1}\text{cm}^{-1}$ ) | $\lambda_{\text{em}} / \text{nm}$ |
|-----------|--------|----------------------------------------------------------------------------------------------|-----------------------------------|
| <b>L1</b> | DMSO   | 268 (26790), 312 (11870)                                                                     | 469                               |
|           | solid  |                                                                                              | No-emission                       |
| <b>L2</b> | DMSO   | 290 (19670)                                                                                  | 468                               |
|           | solid  |                                                                                              | 438, 469                          |
| <b>L3</b> | DMSO   | 288 (28480)                                                                                  | 468                               |
|           | solid  |                                                                                              | 424, 463                          |
| <b>L4</b> | DMSO   | 292 (28860)                                                                                  | 468                               |
|           | solid  |                                                                                              | 439, 469                          |



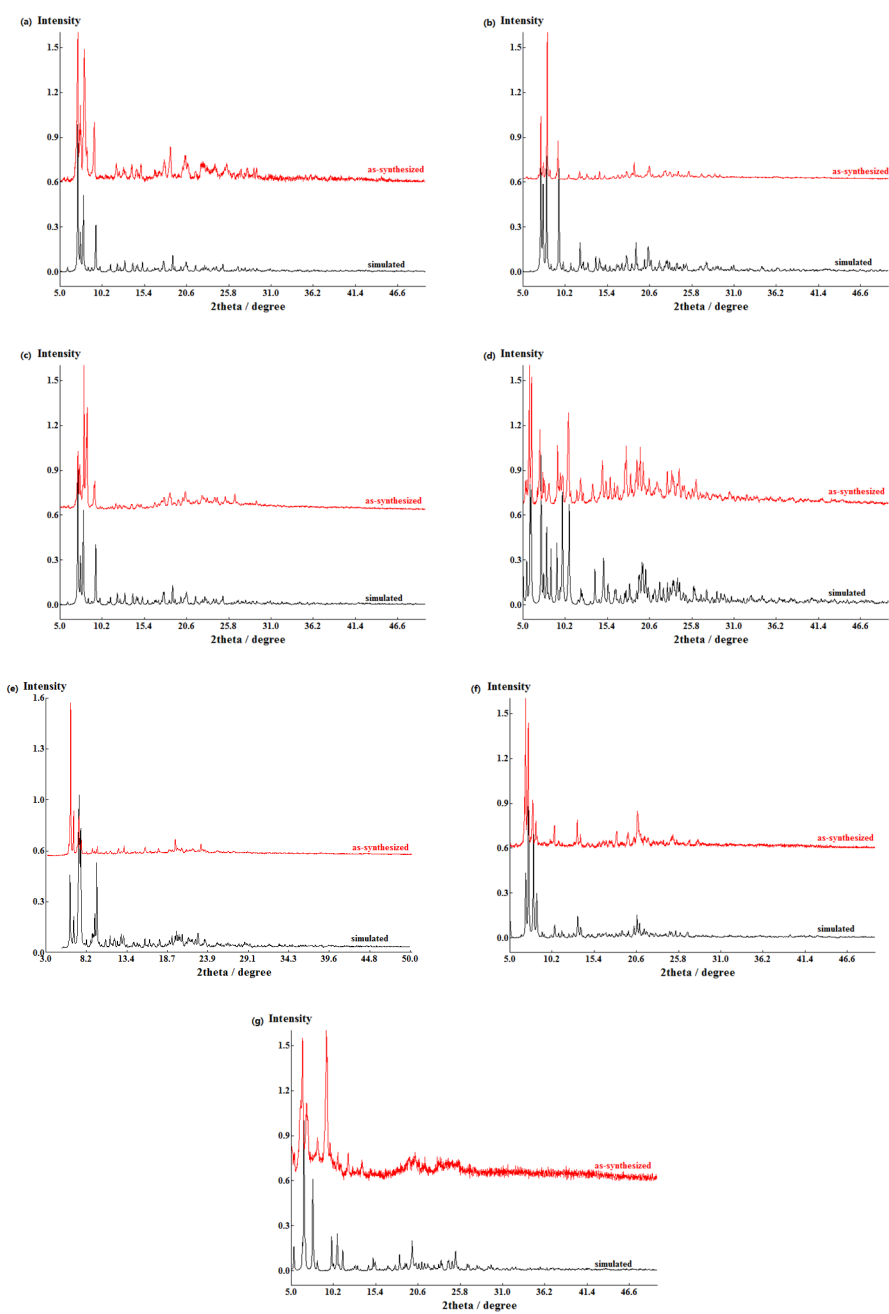

**Figure S1.** Powder X-ray diffraction patterns for the anion complexes: as-synthesized (red) and simulated from the single-crystal diffraction data (black), (a)  $1 \cdot \text{BF}_4$ ; (b)  $1 \cdot \text{PF}_6$ ; (c)  $1 \cdot \text{ClO}_4$ ; (d)  $2 \cdot \text{BF}_4$ ; (e)  $3 \cdot \text{BF}_4$ ; (f)  $4 \cdot \text{BF}_4$ ; and (g)  $4 \cdot \text{F}$ .

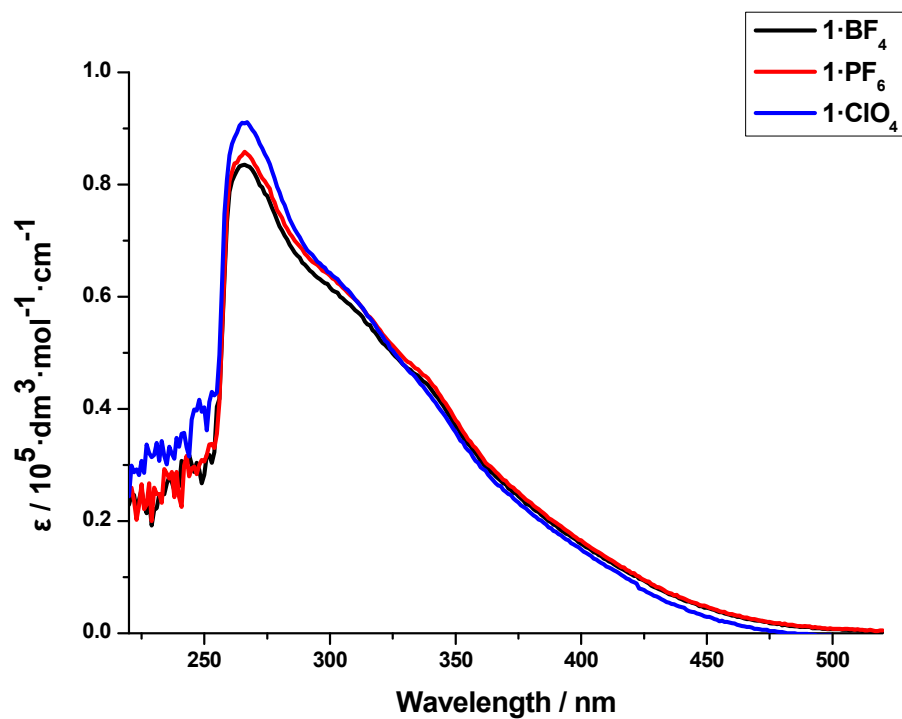

Figure S2. Electronic absorption spectra of  $1 \cdot \text{BF}_4$ ,  $1 \cdot \text{PF}_6$ , and  $1 \cdot \text{ClO}_4$  in DMSO at 298 K.

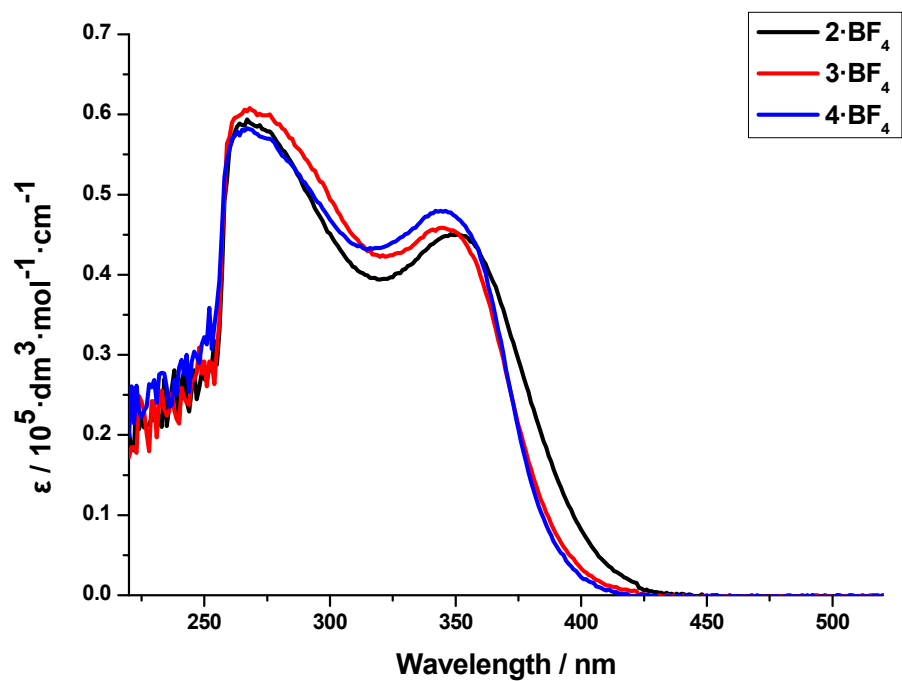

Figure S3. Electronic absorption spectra of  $2 \cdot \text{BF}_4$ – $4 \cdot \text{BF}_4$  in DMSO at 298 K.

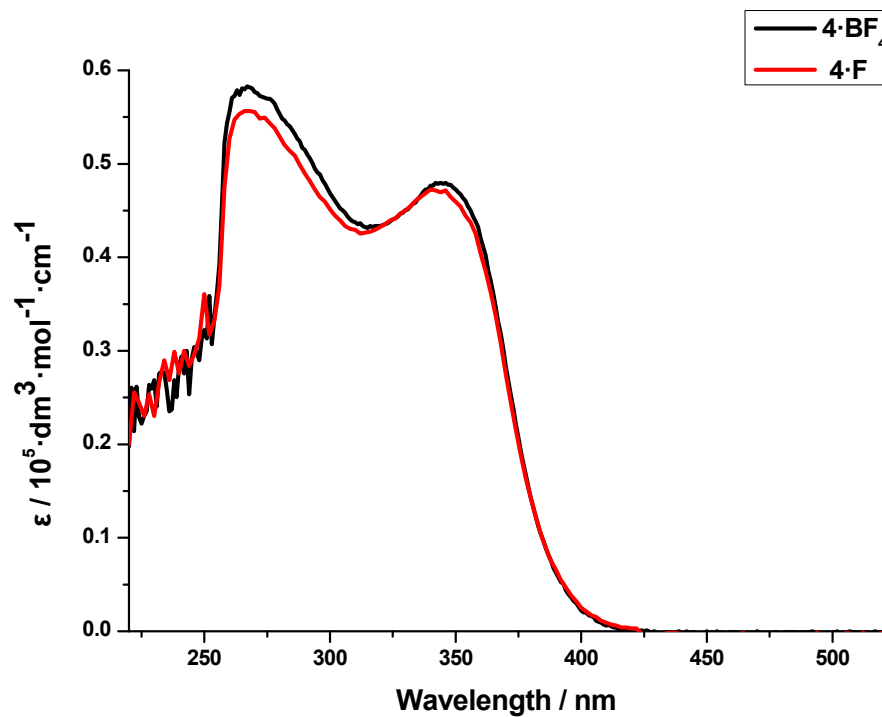

Figure S4. Electronic absorption spectra of **4-BF<sub>4</sub>**, and **4-F** in DMSO at 298 K.

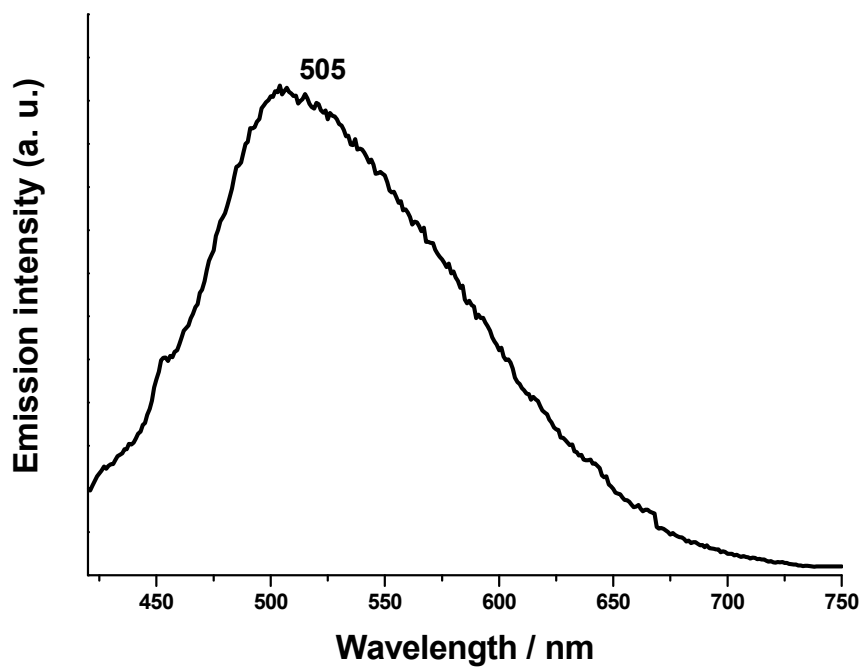

Figure S5. Emission spectrum of **1-BF<sub>4</sub>** in the solid state at 298 K ( $\lambda_{\text{ex}} = 371 \text{ nm}$ ).

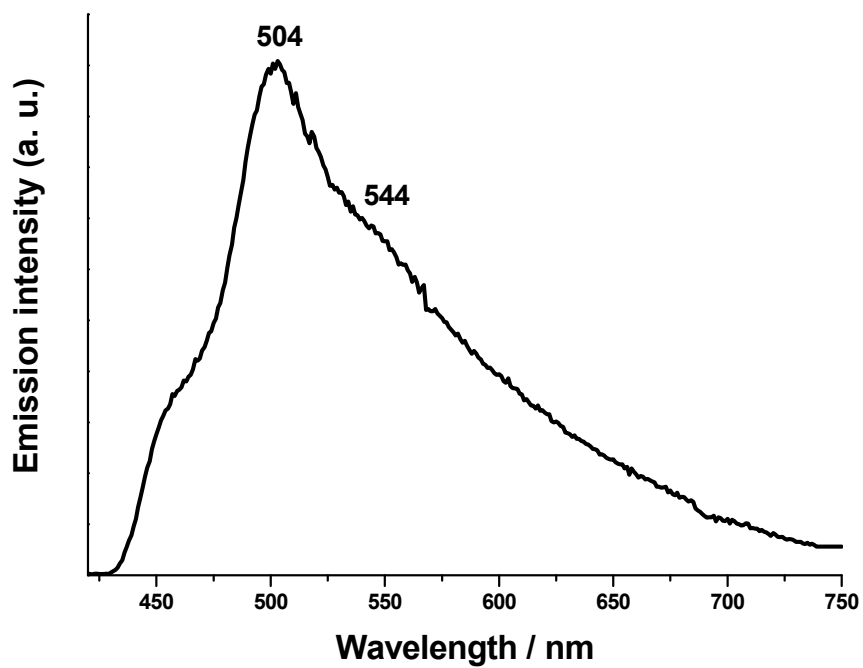

**Figure S6.** Emission spectrum of  $1 \cdot \text{PF}_6$  in the solid state at 298 K ( $\lambda_{\text{ex}} = 372$  nm).

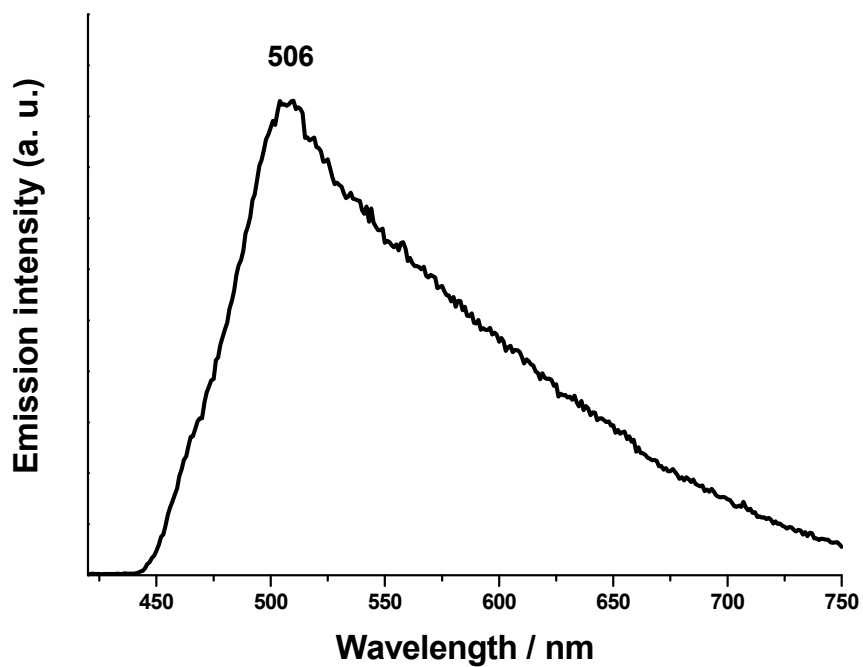

**Figure S7.** Emission spectrum of  $1 \cdot \text{ClO}_4$  in the solid state at 298 K ( $\lambda_{\text{ex}} = 371$  nm).

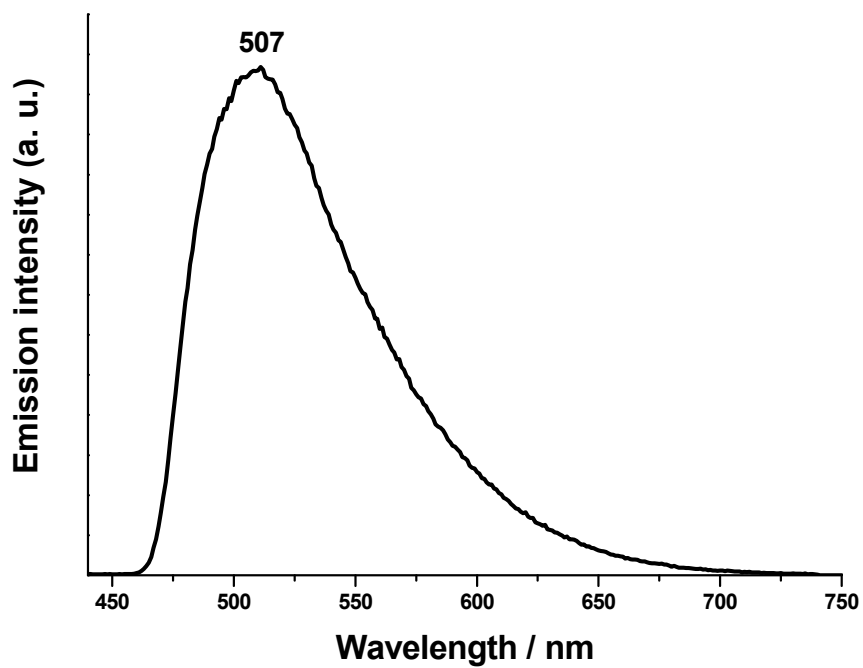

**Figure S8.** Emission spectrum of  $2 \cdot \text{BF}_4$  in the solid state at 298 K ( $\lambda_{\text{ex}} = 428$  nm).

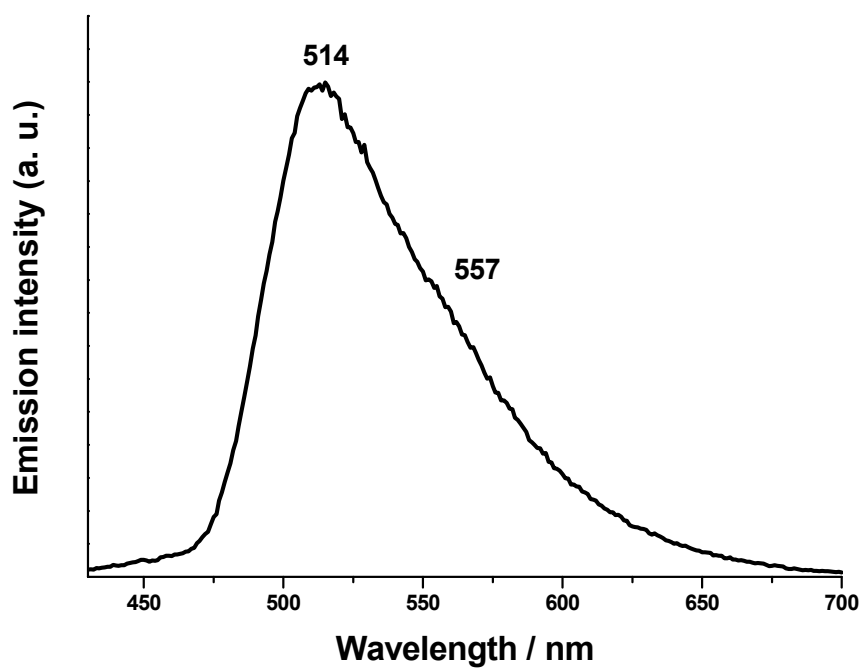

**Figure S9.** Emission spectrum of  $4 \cdot \text{BF}_4$  in the solid state at 298 K ( $\lambda_{\text{ex}} = 407$  nm).

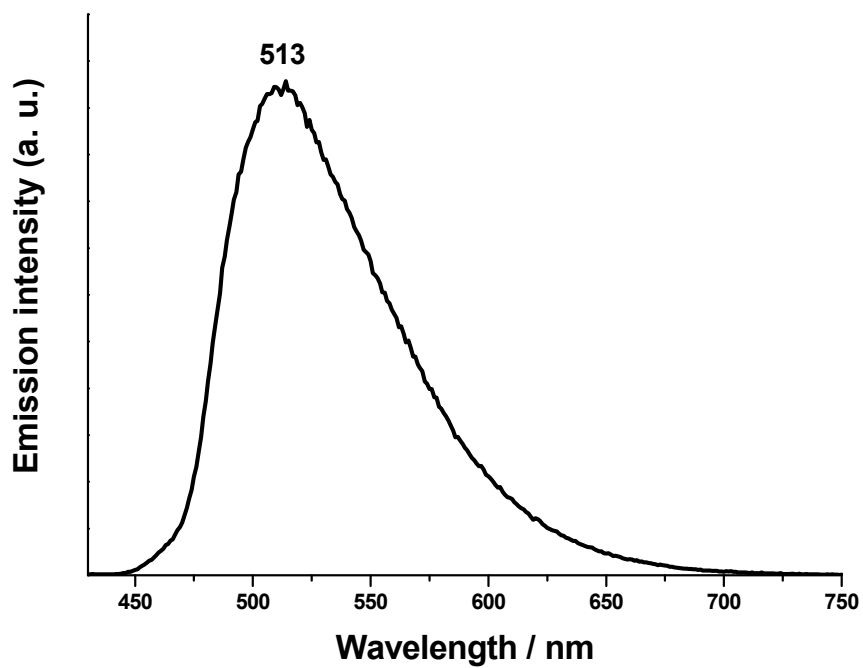

**Figure S10.** Emission spectrum of **4-F** in the solid state at 298 K ( $\lambda_{\text{ex}} = 408$  nm).

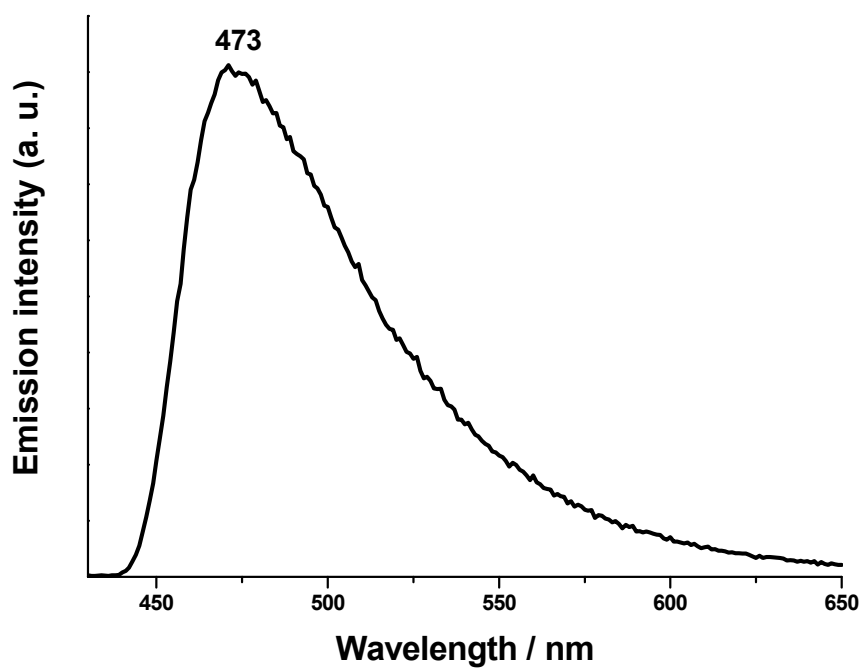

**Figure S11.** Emission spectrum of **1-BF<sub>4</sub>** ( $3.96 \times 10^{-5}$  mol dm<sup>-3</sup>) in DMSO at 298 K ( $\lambda_{\text{ex}} = 380$  nm).

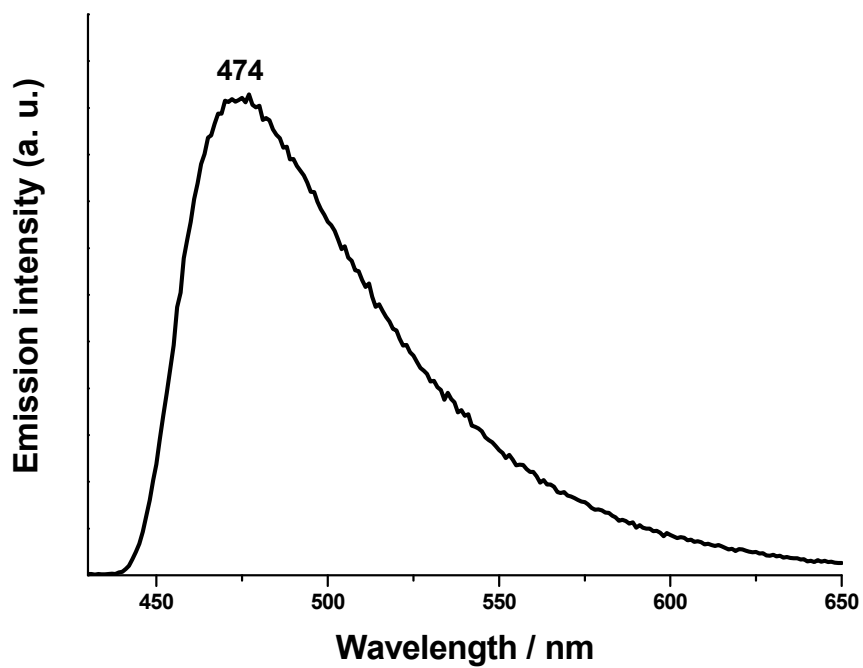

**Figure S12.** Emission spectrum of **1·PF<sub>6</sub>** ( $3.96 \times 10^{-5}$  mol dm<sup>-3</sup>) in DMSO at 298 K ( $\lambda_{\text{ex}} = 380$  nm).

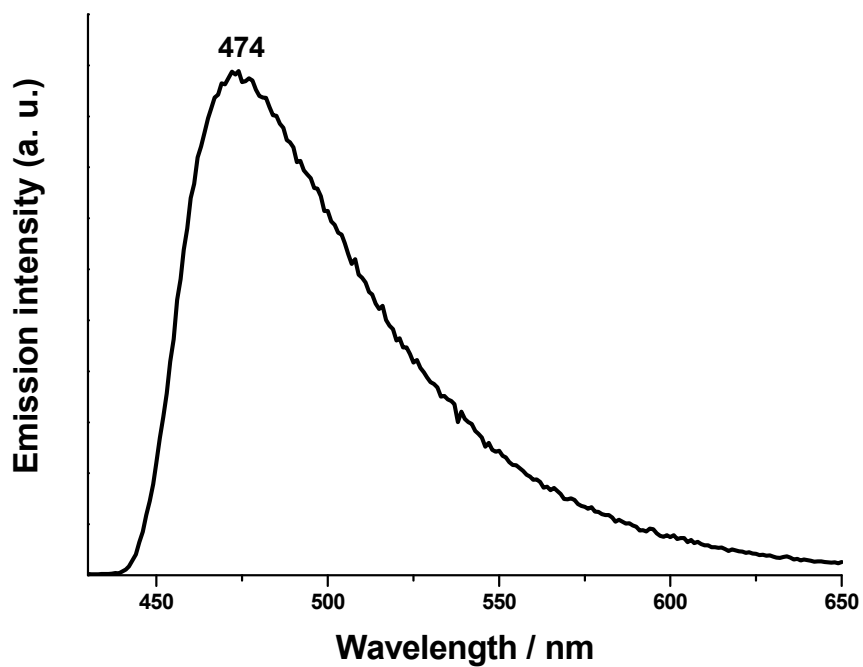

**Figure S13.** Emission spectrum of **1·ClO<sub>4</sub>** ( $3.96 \times 10^{-5}$  mol dm<sup>-3</sup>) in DMSO at 298 K ( $\lambda_{\text{ex}} = 380$  nm).

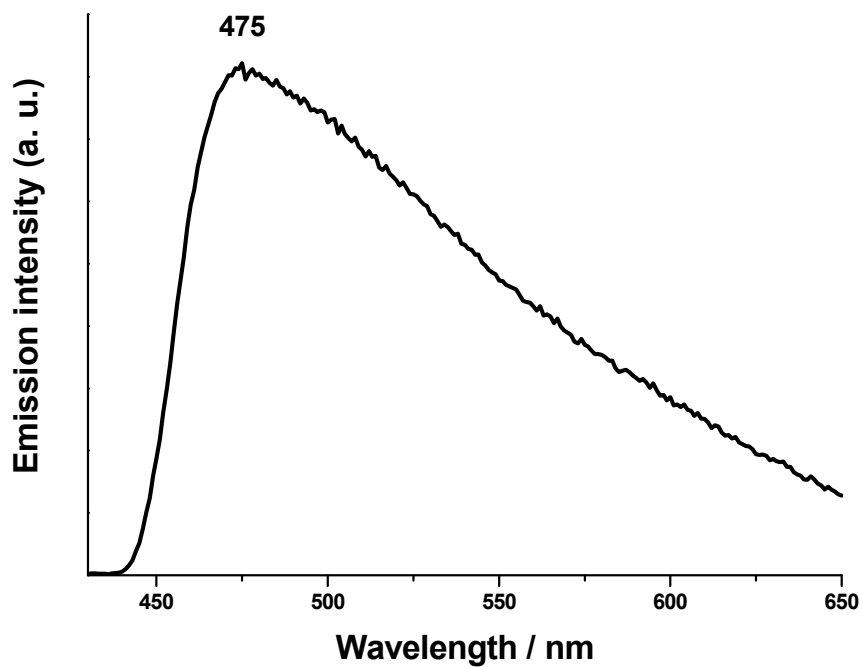

Figure S14. Emission spectrum of  $2 \cdot \text{BF}_4$  ( $3.96 \times 10^{-5} \text{ mol dm}^{-3}$ ) in DMSO at 298 K ( $\lambda_{\text{ex}} = 380 \text{ nm}$ ).

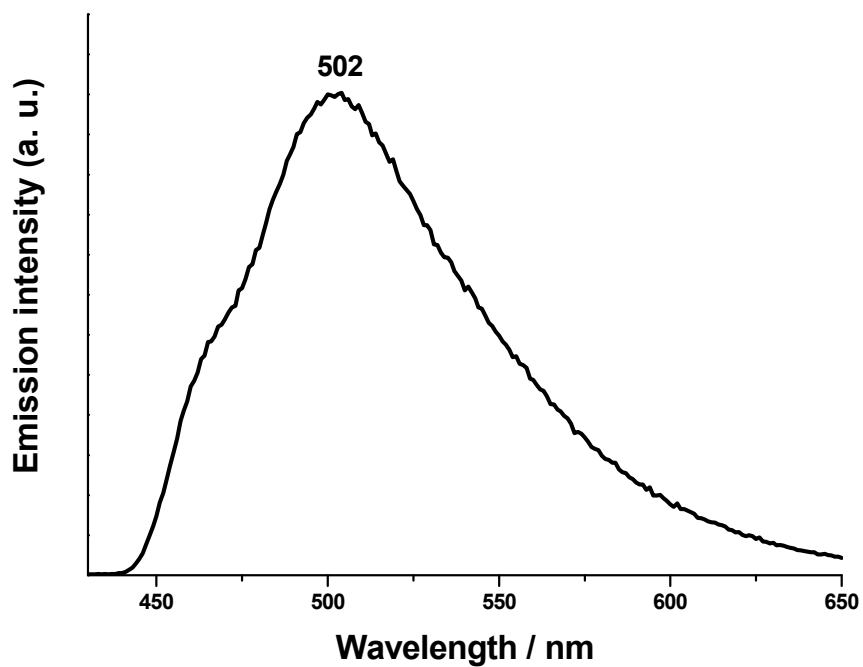

Figure S15. Emission spectrum of  $3 \cdot \text{BF}_4$  ( $3.96 \times 10^{-5} \text{ mol dm}^{-3}$ ) in DMSO at 298 K ( $\lambda_{\text{ex}} = 380 \text{ nm}$ ).



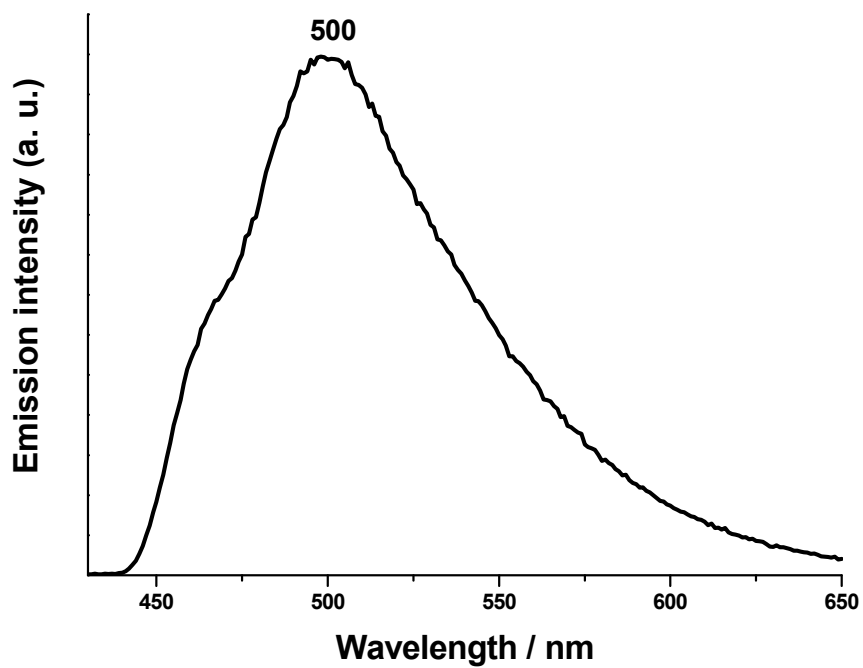

**Figure S16.** Emission spectrum of  $4\cdot\text{BF}_4$  ( $3.96\times 10^{-5}$  mol  $\text{dm}^{-3}$ ) in DMSO at 298 K ( $\lambda_{\text{ex}} = 380$  nm).

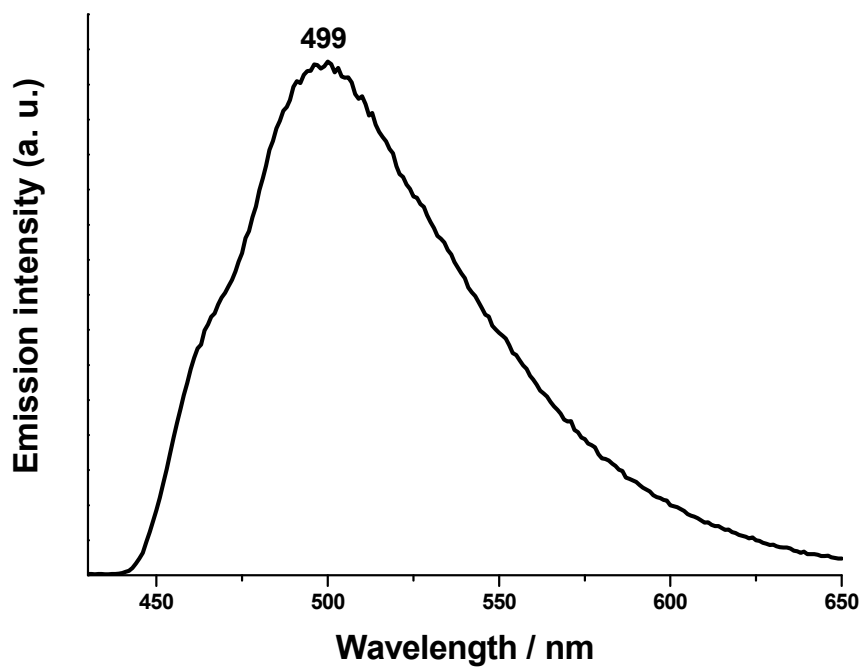

**Figure S17.** Emission spectrum of  $4\cdot\text{F}$  ( $3.96\times 10^{-5}$  mol  $\text{dm}^{-3}$ ) in DMSO at 298 K ( $\lambda_{\text{ex}} = 380$  nm).

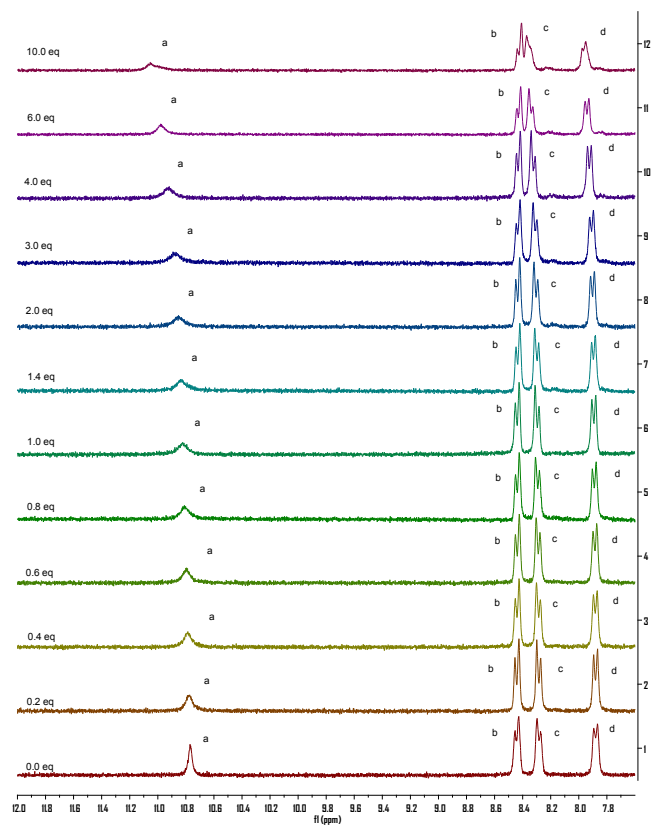

**Figure S18.** The  $^1\text{H}$  NMR spectral changes of  $1 \cdot \text{BF}_4$  upon addition of  $\text{Cl}^-$  in  $\text{DMSO-d}_6$  at 298 K.

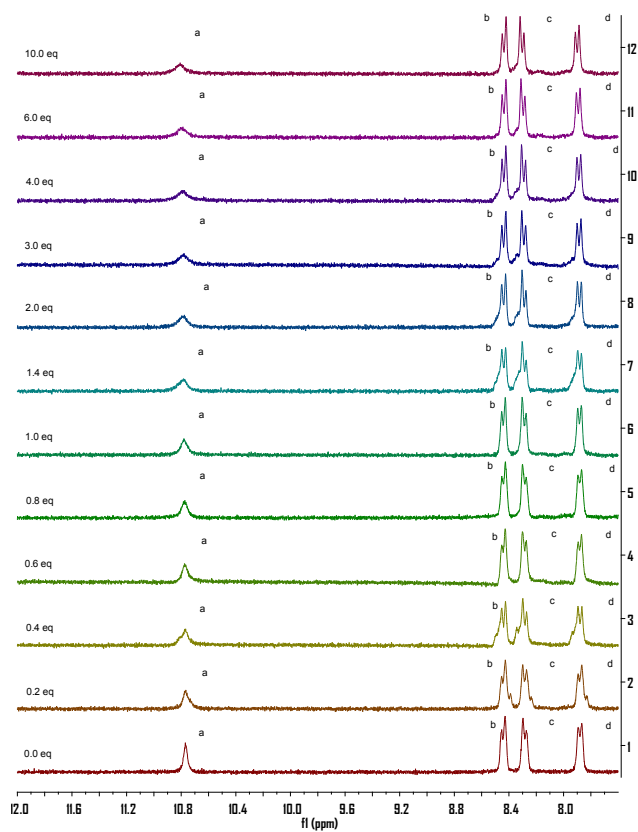

**Figure S19.** The  $^1\text{H}$  NMR spectral changes of  $1 \cdot \text{BF}_4$  upon addition of  $\text{Br}^-$  in  $\text{DMSO-d}_6$  at 298 K.

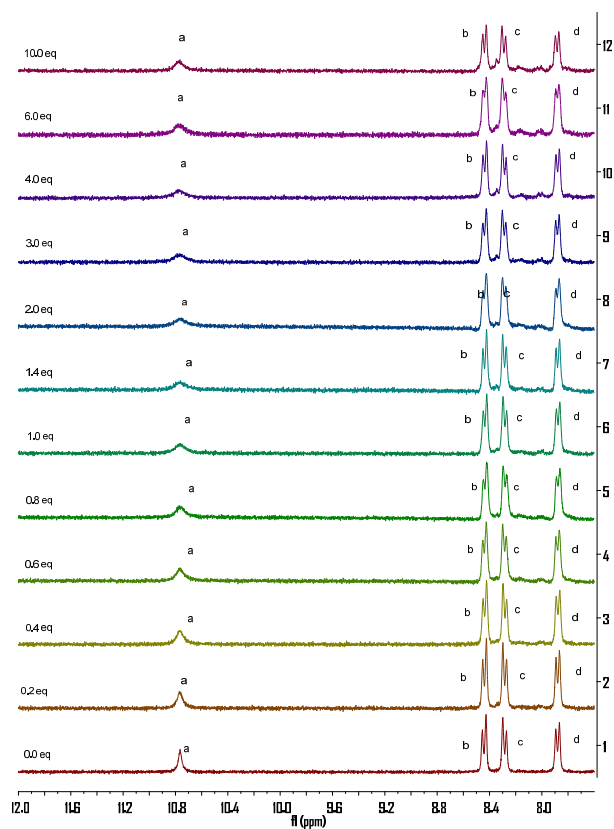

**Figure S20.** The <sup>1</sup>H NMR spectral changes of 1·BF<sub>4</sub> upon addition of I<sup>-</sup> in DMSO-d<sub>6</sub> at 298 K.

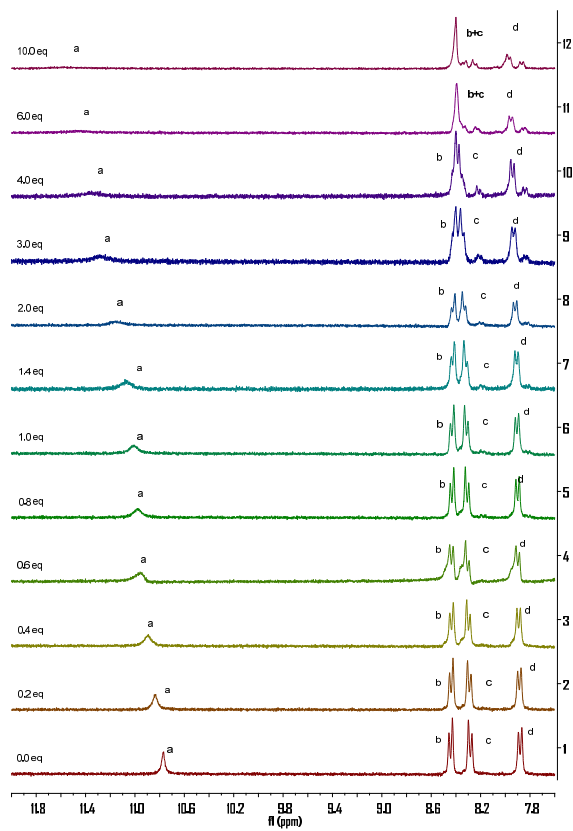

**Figure S21.** The <sup>1</sup>H NMR spectral changes of 1·BF<sub>4</sub> upon addition of OAc<sup>-</sup> in DMSO-d<sub>6</sub> at 298 K.

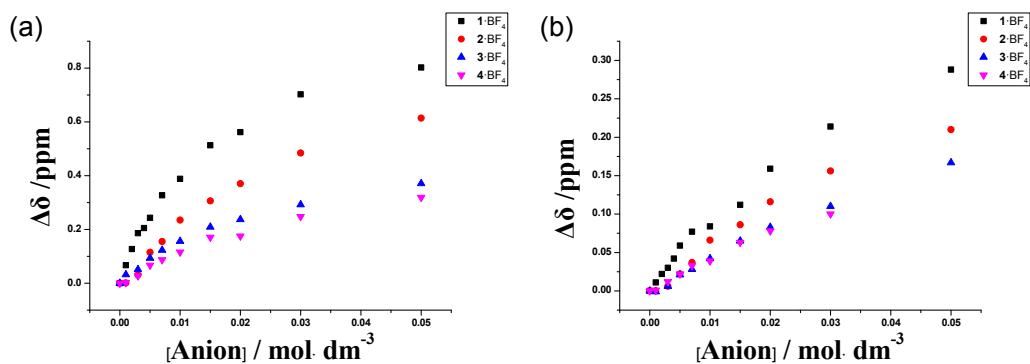

**Figure S22.** The shifts of the signals of amide N-H ( $H_a$ ) of  $1 \cdot \text{BF}_4-4 \cdot \text{BF}_4$  upon addition of the same anion ((a)  $\text{OAc}^-$ ; (b)  $\text{Cl}^-$ ) with different concentrations in  $\text{DMSO}-d_6$  at 298 K.

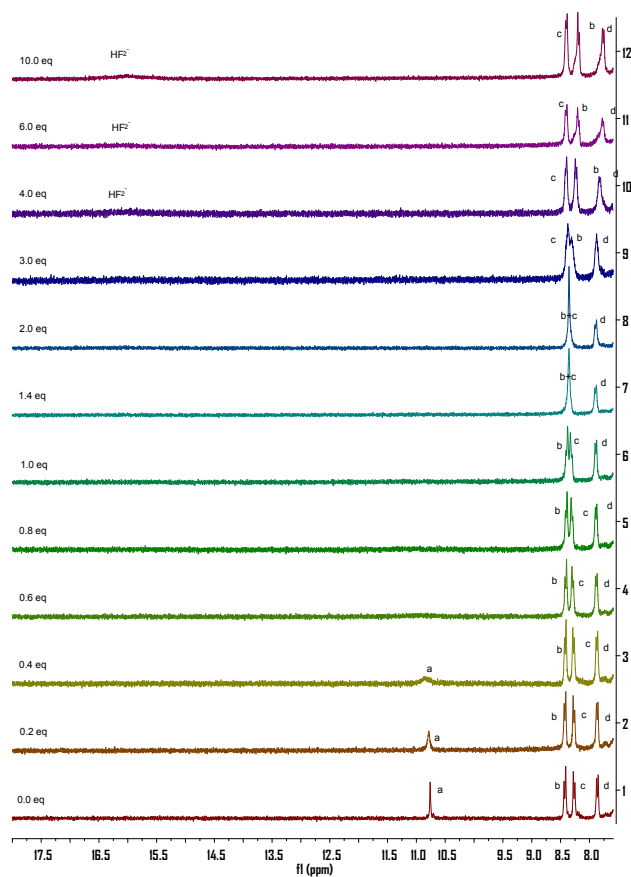

**Figure S23.** The  $^1\text{H}$  NMR spectral changes of  $1 \cdot \text{BF}_4$  upon addition of  $\text{F}^-$  in  $\text{DMSO}-d_6$  at 298 K.

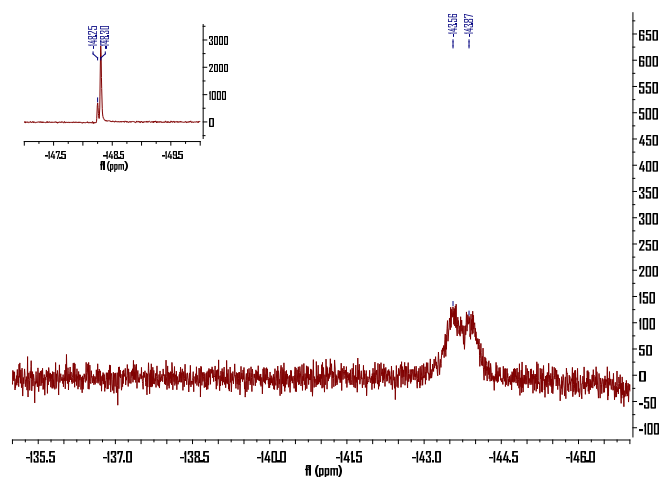

**Figure S24.** The  $^{19}\text{F}$  NMR (DMSO- $d_6$ , 298 K) spectrum of  $1 \cdot \text{BF}_4$  ( $5.0 \times 10^{-3} \text{ mol dm}^{-3}$ ) + 10 eq of  $\text{F}^-$ . Insert: the  $^{19}\text{F}$  NMR (DMSO- $d_6$ , 298 K) spectrum of  $\text{BF}_4^-$  in this system.

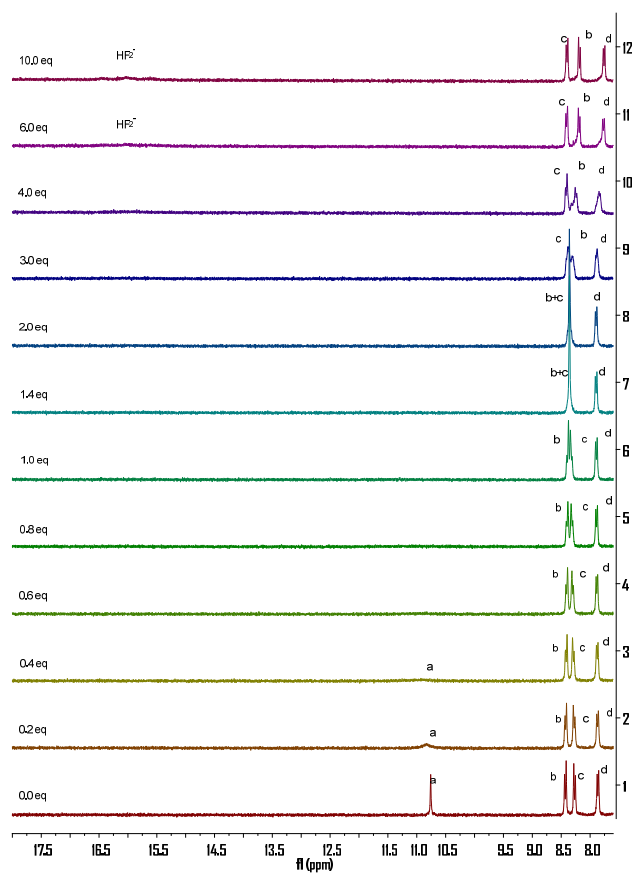

**Figure S25.** The  $^1\text{H}$  NMR spectral changes of  $1 \cdot \text{PF}_6$  upon addition of  $\text{F}^-$  in DMSO- $d_6$  at 298 K.

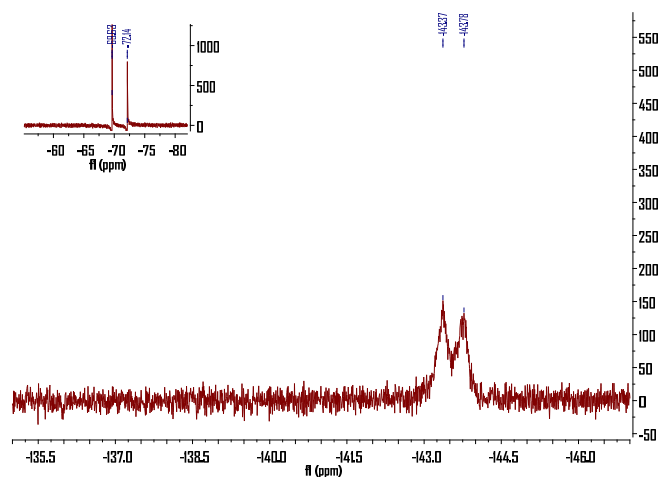

**Figure S26.** The  $^{19}\text{F}$  NMR (DMSO- $d_6$ , 298 K) spectrum of  $1 \cdot \text{PF}_6$  ( $5.0 \times 10^{-3} \text{ mol dm}^{-3}$ ) + 10 eq of  $\text{F}^-$ . Insert: the  $^{19}\text{F}$  NMR (DMSO- $d_6$ , 298 K) spectrum of  $\text{PF}_6^-$  in this system.

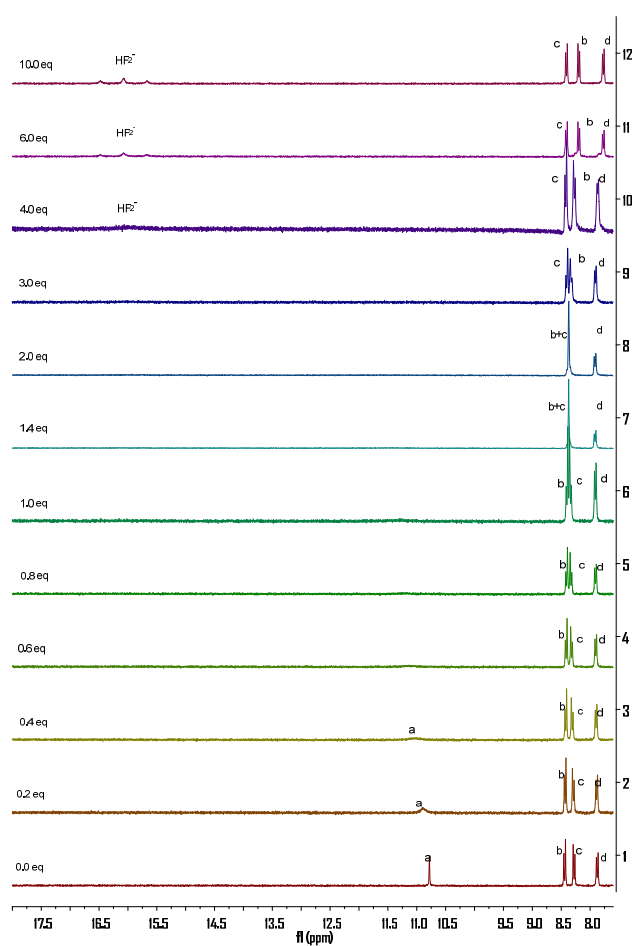

**Figure S27.** The  $^1\text{H}$  NMR spectral changes of  $1 \cdot \text{ClO}_4$  upon addition of  $\text{F}^-$  in DMSO- $d_6$  at 298 K.

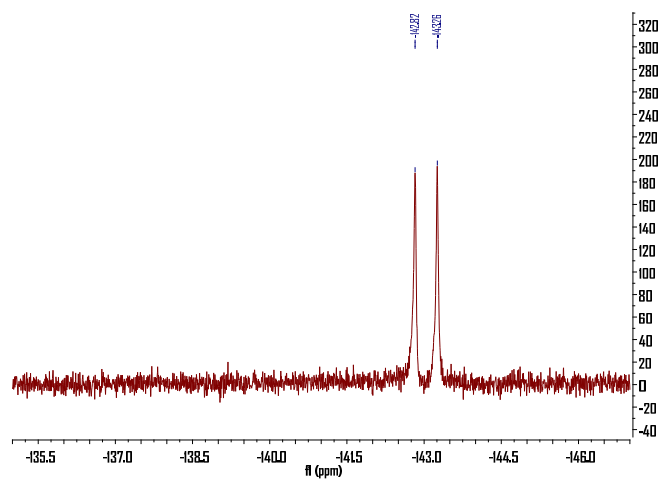

**Figure S28.** The  $^{19}\text{F}$  NMR (DMSO- $d_6$ , 298 K) spectrum of  $1 \cdot \text{ClO}_4$  ( $5.0 \times 10^{-3} \text{ mol dm}^{-3}$ ) + 10 eq of  $\text{F}^-$ .

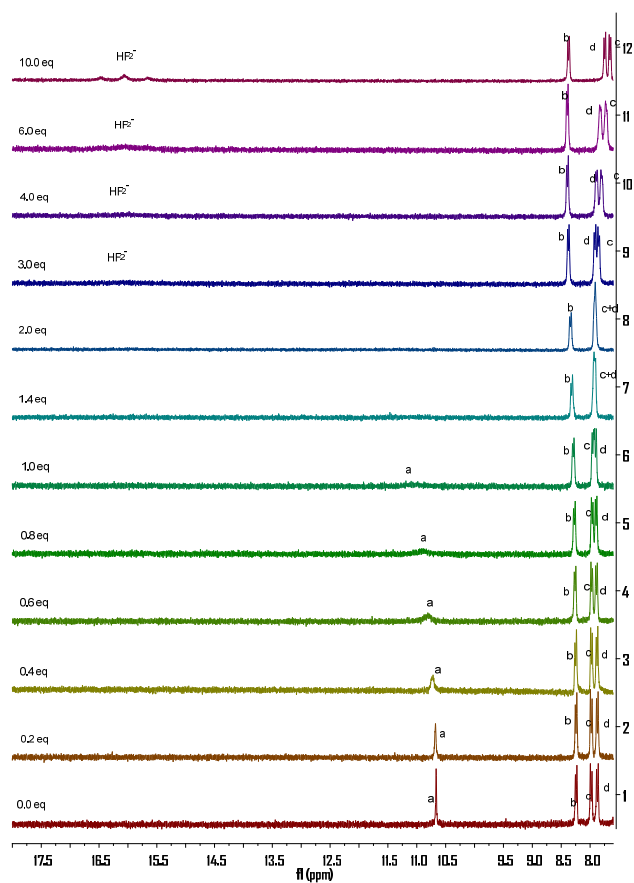

**Figure S29.** The  $^1\text{H}$  NMR spectral changes of  $2 \cdot \text{BF}_4$  upon addition of  $\text{F}^-$  in DMSO- $d_6$  at 298 K.

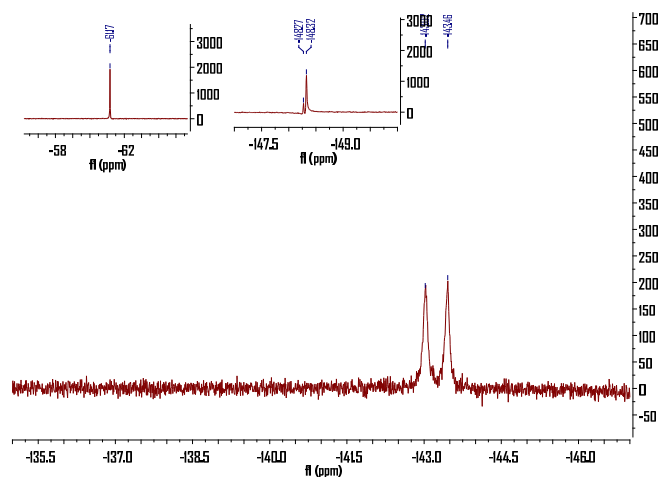

**Figure S30.** The  $^{19}\text{F}$  NMR (DMSO- $\text{d}_6$ , 298 K) spectrum of  $2 \cdot \text{BF}_4$  ( $5.0 \times 10^{-3} \text{ mol dm}^{-3}$ ) + 10 eq of  $\text{F}^-$ . Insert: the  $^{19}\text{F}$  NMR (DMSO- $\text{d}_6$ , 298 K) spectrum of  $\text{CF}_3$  group (left) and  $\text{BF}_4^-$  (right) in this system.

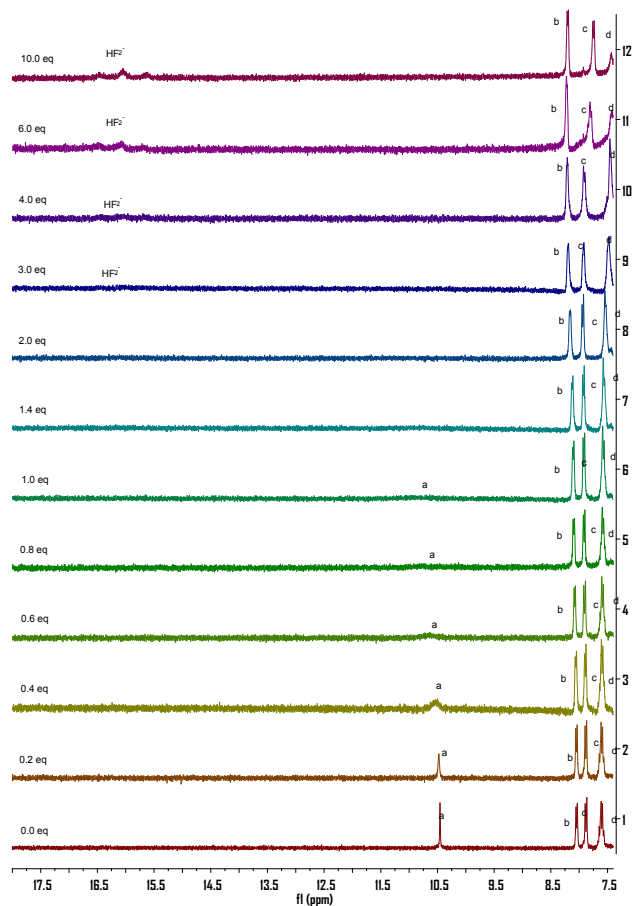

**Figure S31.** The  $^1\text{H}$  NMR spectral changes of  $3 \cdot \text{BF}_4$  upon addition of  $\text{F}^-$  in DMSO- $\text{d}_6$  at 298 K.



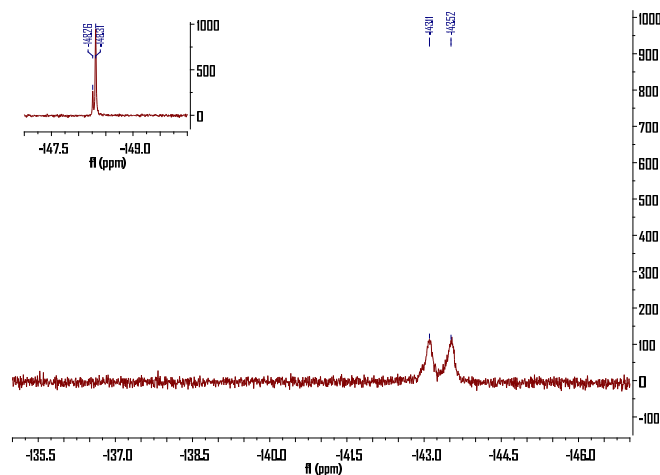

**Figure S32.** The  $^{19}\text{F}$  NMR (DMSO- $d_6$ , 298 K) spectrum of  $3 \cdot \text{BF}_4$  ( $5.0 \times 10^{-3} \text{ mol dm}^{-3}$ ) + 10 eq of  $\text{F}^-$ . Insert: the  $^{19}\text{F}$  NMR (DMSO- $d_6$ , 298 K) spectrum of  $\text{BF}_4^-$  in this system.

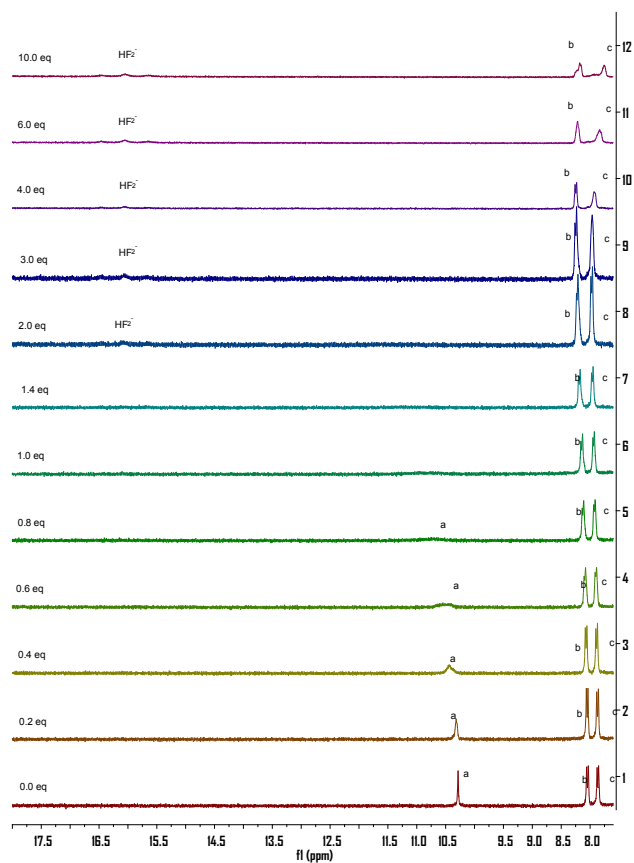

**Figure S33.** The  $^1\text{H}$  NMR spectral changes of  $4 \cdot \text{BF}_4$  upon addition of  $\text{F}^-$  in DMSO- $d_6$  at 298 K.

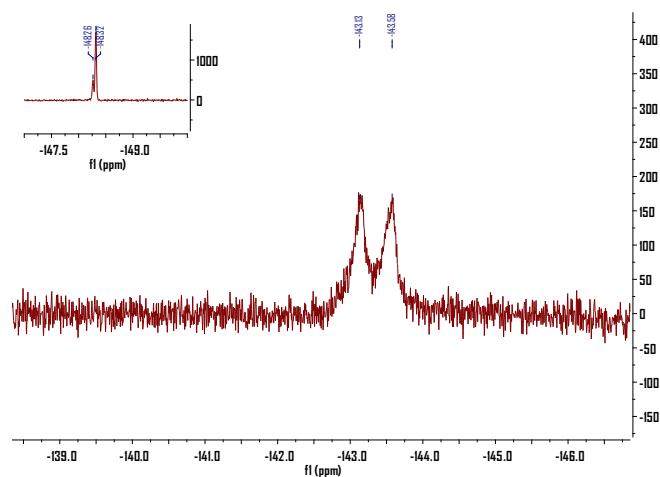

**Figure S34.** The  $^{19}\text{F}$  NMR (DMSO- $d_6$ , 298 K) spectrum of  $4 \cdot \text{BF}_4$  ( $5.0 \times 10^{-3} \text{ mol dm}^{-3}$ ) + 10 eq of  $\text{F}^-$ . Insert: the  $^{19}\text{F}$  NMR (DMSO- $d_6$ , 298 K) spectrum of  $\text{BF}_4^-$  in this system.

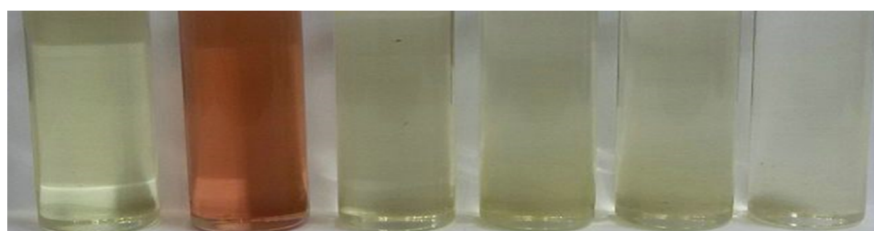

$1 \cdot \text{BF}_4$     $1 \cdot \text{BF}_4 + \text{F}^-$     $1 \cdot \text{BF}_4 + \text{Cl}^-$     $1 \cdot \text{BF}_4 + \text{Br}^-$     $1 \cdot \text{BF}_4 + \text{I}^-$     $1 \cdot \text{BF}_4 + \text{OAc}^-$

**Figure S35.** Colors of  $1 \cdot \text{BF}_4$  ( $1.98 \times 10^{-5} \text{ mol dm}^{-3}$ ) in DMSO in the presence of 100 eq  $\text{F}^-$ ,  $\text{Cl}^-$ ,  $\text{Br}^-$ ,  $\text{I}^-$  and  $\text{OAc}^-$ .

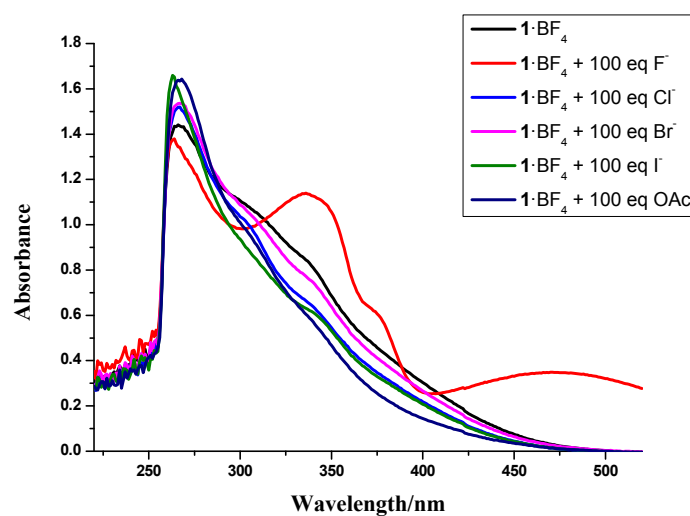

**Figure S36.** The UV-vis spectra of  $1 \cdot \text{BF}_4$  ( $1.98 \times 10^{-5} \text{ mol dm}^{-3}$ ) in DMSO in the presence of 100 eq  $\text{F}^-$ ,  $\text{Cl}^-$ ,  $\text{Br}^-$ ,  $\text{I}^-$  and  $\text{OAc}^-$ .

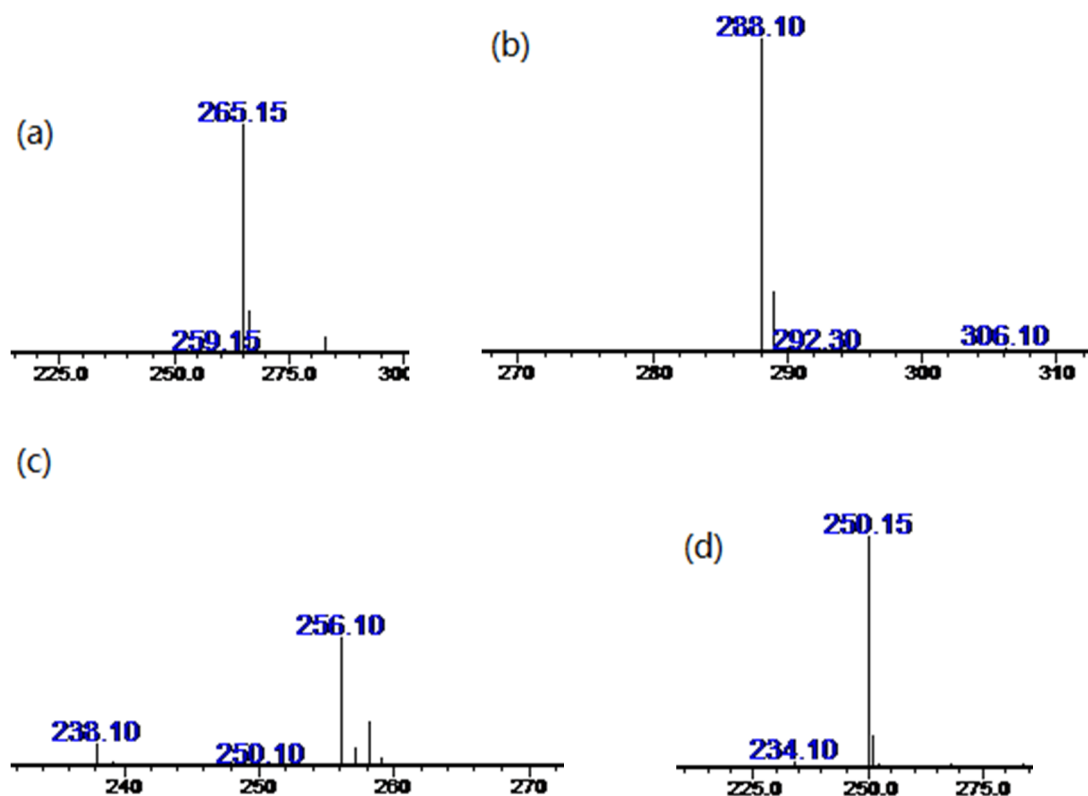

Figure S37. The ESI-MS spectra of ligands, (a) L1; (b) L2; (c) L3; (d) L4. (partial spectra are shown due to the large scale of the spectra)

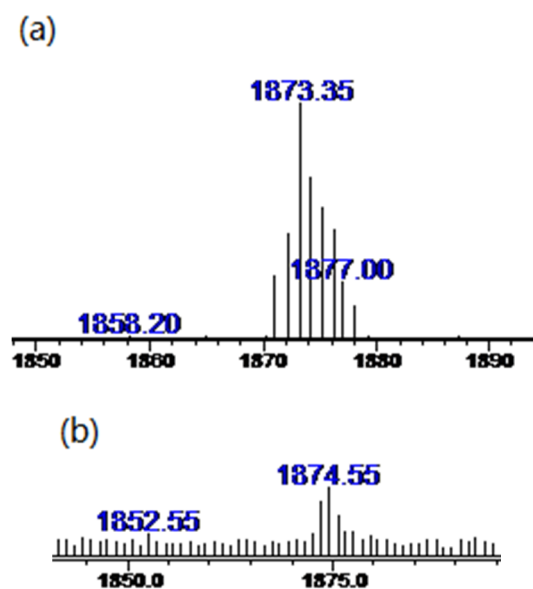

(c)

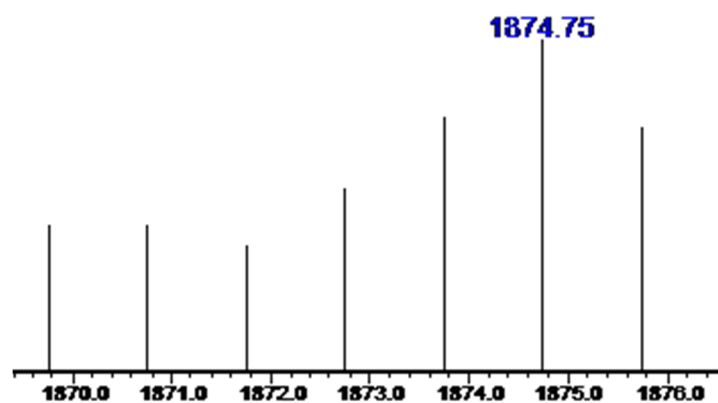

(d)

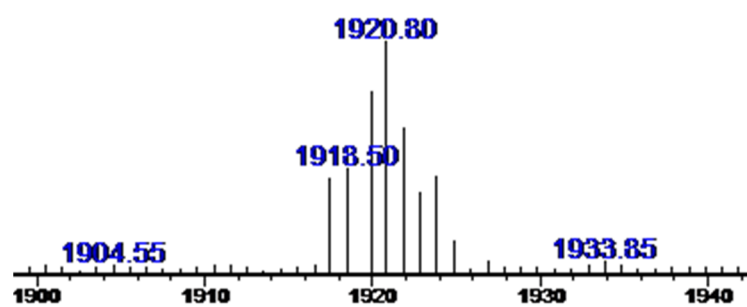

(e)

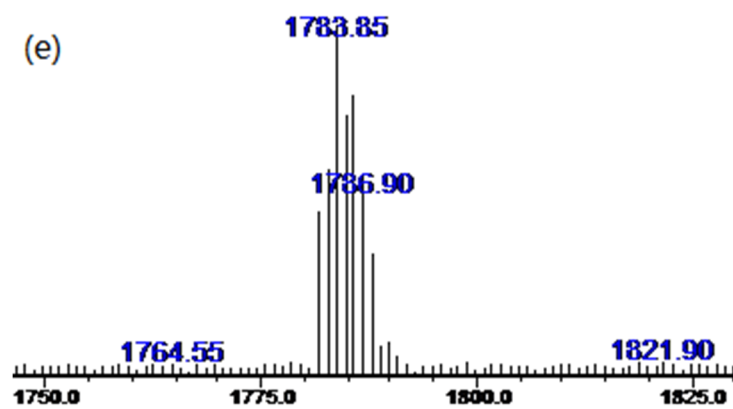

(f)

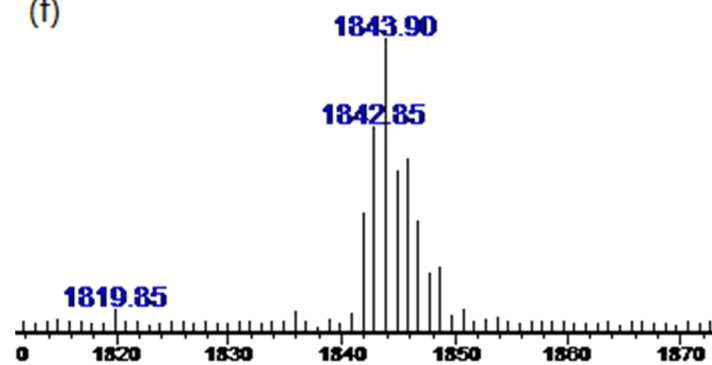

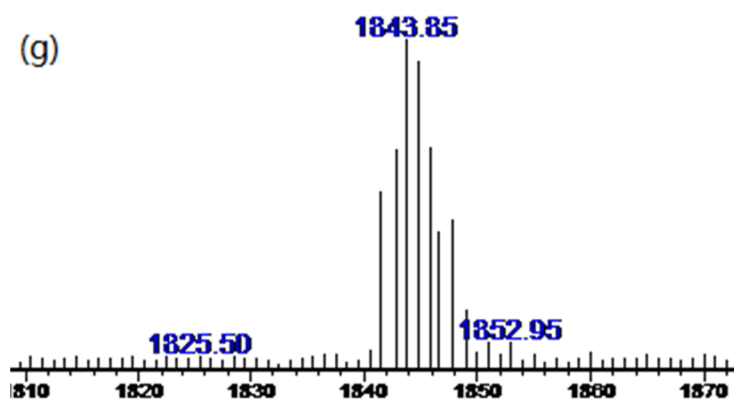

**Figure S38.** The ESI-MS spectra of complexes, (a)  $1 \cdot \text{BF}_4$ ; (b)  $1 \cdot \text{PF}_6$ ; (c)  $1 \cdot \text{ClO}_4$ ; (d)  $2 \cdot \text{BF}_4$ ; (e)  $3 \cdot \text{BF}_4$ ; (f)  $4 \cdot \text{BF}_4$ ; and (g)  $4 \cdot \text{F}$ . (partial spectra are shown due to the large scale of the spectra)
